# Supplementary material for: Dynamics of CH/n hydrogen bond networks probed by time-resolved CARS spectroscopy
Source: Royal Society of Chemistry journal article supplement (doi:10.1039/d4sc03985h), 2024-01-01
Supplement: d4sc03985h1.pdf [file d4sc03985h1.pdf]

ARTICLE

# Dynamics of CH/n Hydrogen Bond Network Probed by Time-Resolved CARS Spectroscopy

Received 00th January 20xx,  
Accepted 00th January 20xx

Hanlin Zhu<sup>†a,b</sup>, Xinyu Deng<sup>†a,b</sup>, Vladislav V. Yakovlev<sup>\*c,d,e</sup>, Delong Zhang<sup>\*a,b</sup>

DOI: 10.1039/x0xx00000x

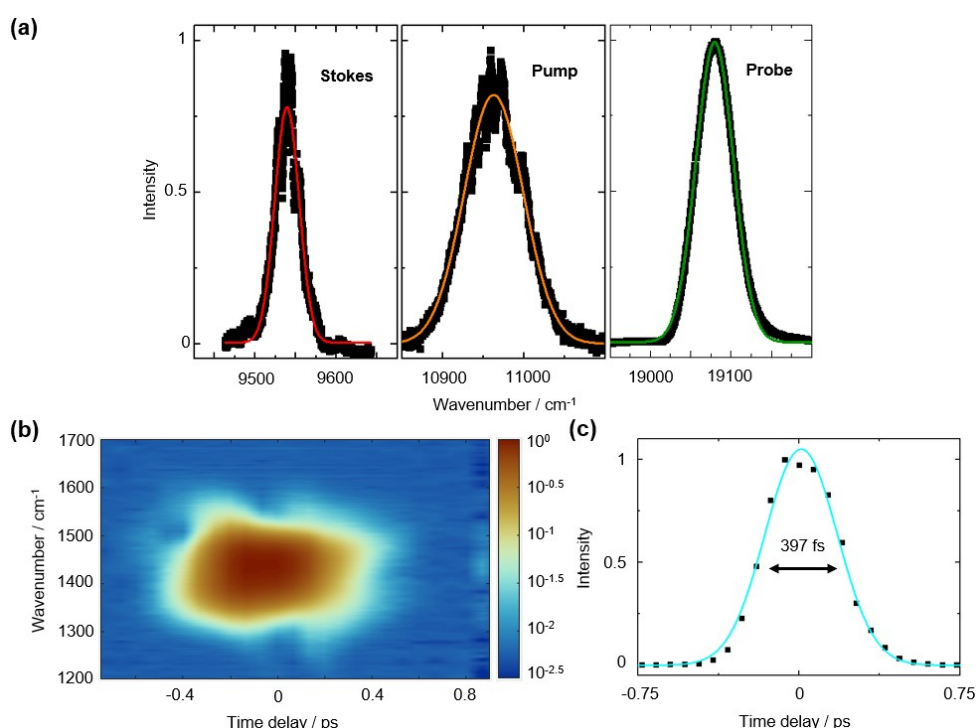

**Fig. S1.** Time-resolved coherent anti-Stokes Raman scattering (T-CARS) spectroscopy platform. (a) Representative spectra of the stimulation beams, Stokes, pump, and probe beams. Spectral bandwidth (FWHM) of each beam is 35 cm<sup>-1</sup>, 86 cm<sup>-1</sup>, and 55 cm<sup>-1</sup>. (b) Time- frequency-resolved spectrum of water. The spectra are colored with the Roma color map. (c) Pulse width (FWHM) of four-wave-mixing signal of water.

<sup>a</sup> Zhejiang Key Laboratory of Micro-nano Quantum Chips and Quantum Control, School of Physics, Zhejiang University, Hangzhou, Zhejiang 310027, China.

<sup>b</sup> MOE Frontier Science Center for Brain Science & Brain-Machine Integration, Zhejiang University, Hangzhou, Zhejiang 310027, China.

<sup>c</sup> Department of Biomedical Engineering, Texas A&M University, College Station, TX 77843, USA.

<sup>d</sup> Department of Physics and Astronomy, Texas A&M University, College Station, TX 77843, USA.

<sup>e</sup> Department of Electrical and Computer Engineering, Texas A&M University, College Station, TX 77843, USA.

<sup>†</sup> These authors contributed equally to this work.

Supplementary Information available: [details of any supplementary information available should be included here]. See DOI: 10.1039/x0xx00000x

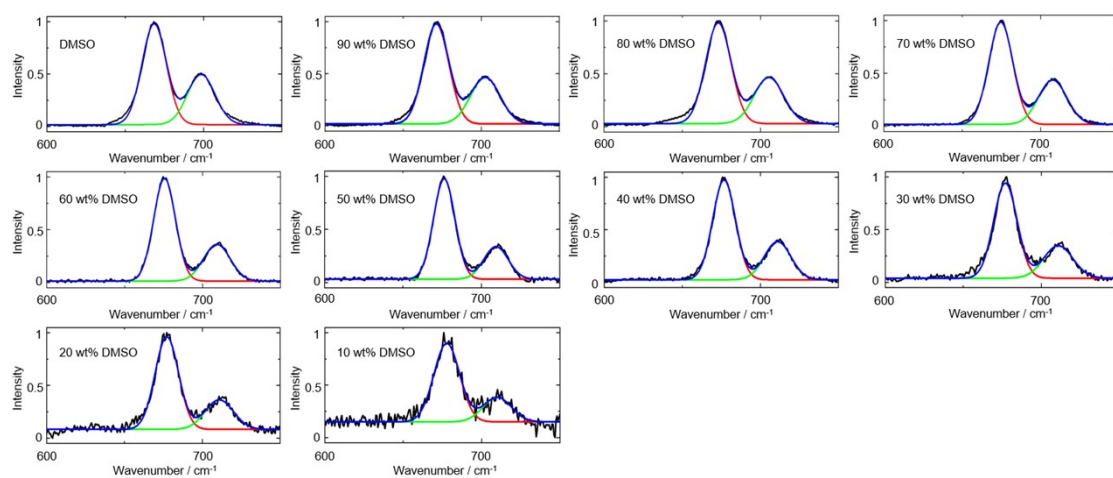

Fig. S2. Bimodal Gaussian fitting of C-S stretching symmetric and anti-symmetric modes.

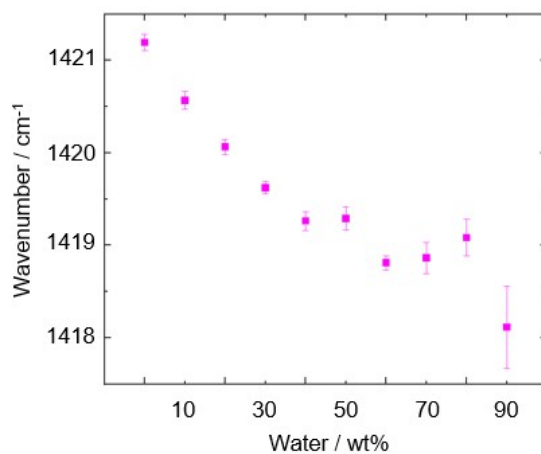

Fig. S3. Resonant frequency of C-H bending mode plotted against water concentration in weight percent.

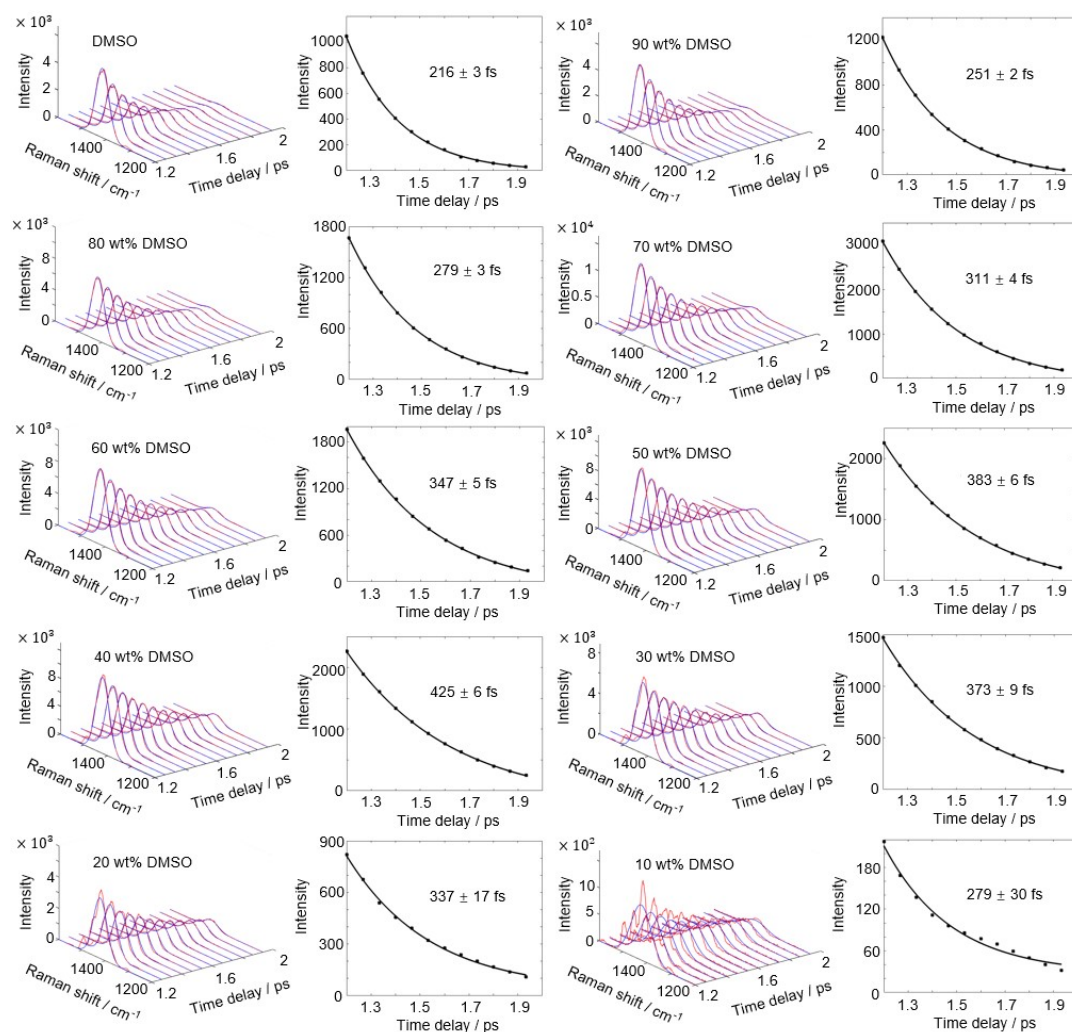

Fig. S4. T-CARS spectra of DMSO-water solution.
